# Supplementary material
Source: Research Square preprint supplement (doi:10.21203/rs.3.rs-9563416/v1)
Supplement: Supplementary file 1 [file b45e5926b30fb4a1a380fc44.doc]

| Table 1 Correlation between ADC, FF, MY-RADS total burden score and plasma cell infiltration ratio for D/SP/N patterns | | | | | | | | |
| --- | --- | --- | --- | --- | --- | --- | --- | --- |
|  | plasma cell infiltration ratio | | plasma cell infiltration ratio | | | plasma cell infiltration ratio | | |
|  | r | p |  | r | p |  | r | p |
| **Total burden score** | 0.44 | 0.004* | **FF** |  |  | **ADC** |  |  |
| FF-L1 | -0.66 | ＜0.001* | ADC-L1 | 0.47 | 0.004* |
| FF-L2 | -0.75 | ＜0.001* | ADC-L2 | 0.49 | 0.001* |
| FF-L3 | -0.84 | ＜0.001* | ADC-L3 | 0.65 | ＜0.001* |
| FF-L4 | -0.72 | ＜0.001* | ADC-L4 | 0.48 | 0.001* |
| FF-L5 | -0.84 | ＜0.001* | ADC-L5 | 0.49 | 0.001* |
| FF-AV | -0.79 | ＜0.001* | ADC-AV | 0.58 | ＜0.001* |
| FF, fat fraction; AV, Average. | | | | | | | | |

| Table 2 Correlation between ADC, FF, MY-RADS total burden score and plasma cell infiltration ratio for F pattern | | | | | | | | |
| --- | --- | --- | --- | --- | --- | --- | --- | --- |
|  | plasma cell infiltration ratio | | plasma cell infiltration ratio | | | plasma cell infiltration ratio | | |
|  | r | p |  | r | p |  | r | p |
| **Total burden score** | 0.55 | 0.003* | **FF** |  |  | **ADC** |  |  |
| FF-L1 | 0.18 | 0.385 | ADC-L1 | 0.06 | 0.760 |
| FF-L2 | -0.06 | 0.799 | ADC-L2 | 0.29 | 0.189 |
| FF-L3 | -0.15 | 0.489 | ADC-L3 | 0.01 | 0.997 |
| FF-L4 | 0.11 | 0.603 | ADC-L4 | 0.07 | 0.743 |
| FF-L5 | 0.21 | 0.287 | ADC-L5 | -0.02 | 0.908 |
| FF-AV | 0.07 | 0.717 | ADC-AV | 0.06 | 0.766 |
| FF, fat fraction; AV, Average. | | | | | | | | |

| Table 3 Correlation between ADC, FF, MY-RADS total burden score and plasma cell infiltration ratio for M pattern | | | | | | | | |
| --- | --- | --- | --- | --- | --- | --- | --- | --- |
|  | plasma cell infiltration ratio | | plasma cell infiltration ratio | | | plasma cell infiltration ratio | | |
|  | r | p |  | r | p |  | r | p |
| **Total burden score** | 0.33 | 0.047* | **FF** |  |  | **ADC** |  |  |
| FF-L1 | -0.69 | ＜0.001* | ADC-L1 | 0.50 | 0.002* |
| FF-L2 | -0.70 | ＜0.001* | ADC-L2 | 0.54 | 0.002* |
| FF-L3 | -0.72 | ＜0.001* | ADC-L3 | 0.58 | 0.001* |
| FF-L4 | -0.70 | ＜0.001* | ADC-L4 | 0.48 | 0.003* |
| FF-L5 | -0.67 | ＜0.001* | ADC-L5 | 0.47 | 0.004* |
| FF-AV | -0.71 | ＜0.001* | ADC-AV | 0.54 | ＜0.001* |
| FF, fat fraction; AV, Average. | | | | | | | | |
